# Supplementary material
Source: ML conference proceedings conference paper supplement (https://proceedings.mlr.press/v48/yena16.html)
Supplement: Supplementary file [file yena16-supp.pdf]

## 5. Appendix A: Proof for Theorem 2

Recall that the Augmented Lagrangian  $\mathcal{L}(W_1, W_2, Y)$  is of the form

$$\langle D, W_1 \rangle + \langle Y, W_1 - W_2 \rangle + \frac{\rho}{2} \|W_1 - W_2\|^2.$$

Then let  $X = [W_1; W_2]$  be the primal variables and denote

$$\mathcal{X}(Y) := \{X | X = \arg \min_X \mathcal{L}(X, Y)\}$$

with

$$\bar{X}^t := \operatorname{argmin}_{\bar{X} \in \mathcal{X}(Y^t)} \|\bar{X} - X^t\|,$$

and let

$$\mathbf{A}X = \begin{bmatrix} I & -I \end{bmatrix} \begin{bmatrix} W_1 \\ W_2 \end{bmatrix} = W_1 - W_2 \quad (23)$$

and

$$\langle C, X \rangle = \begin{bmatrix} D \\ O \end{bmatrix}^T \begin{bmatrix} W_1 \\ W_2 \end{bmatrix} = \langle D, W_1 \rangle \quad (24)$$

The Augmented Lagrangian can be re-written as

$$\mathcal{L}(X, Y) = \langle C, X \rangle + \langle Y, \mathbf{A}X \rangle + \frac{\rho}{2} \|\mathbf{A}X\|^2. \quad (25)$$

The dual function is

$$d(Y) = \min_{X \in \operatorname{Conv}(\mathcal{A}) \times \operatorname{Conv}(\mathcal{G})} \mathcal{L}(X, Y)$$

and

$$d^* = \max_Y d(Y)$$

is the optimal dual function value. Then we measure the sub-optimality of iterates  $\{(X^t, Y^t)\}_{t=1}^T$  given by GDMM in terms of dual function difference

$$\Delta_d^t = d^* - d(Y^t)$$

and the primal function difference for a given dual iterate  $Y^t$ :

$$\Delta_p^t = \mathcal{L}(X^{t+1}, Y^t) - d(Y^t)$$

yielded by  $X^{t+1}$  obtained from AFW steps. Then we have following lemma.

**Lemma 1** (Dual Progress). *Each iteration of GDMM (Algorithm 1) has*

$$\Delta_d^t - \Delta_d^{t-1} \leq -\eta(\mathbf{A}X^t)^T(\mathbf{A}\bar{X}^t). \quad (26)$$

*Proof.*

$$\begin{aligned} \Delta_d^t - \Delta_d^{t-1} &= (d^* - d(Y^t)) - (d^* - d(Y^{t-1})) \\ &= \mathcal{L}(\bar{X}^{t-1}, Y^{t-1}) - \mathcal{L}(\bar{X}^t, Y^t) \\ &\leq \mathcal{L}(\bar{X}^t, Y^{t-1}) - \mathcal{L}(\bar{X}^t, Y^t) \\ &= \langle Y^{t-1} - Y^t, \mathbf{A}\bar{X}^t \rangle \\ &= -\eta \langle \mathbf{A}X^t, \mathbf{A}\bar{X}^t \rangle \end{aligned}$$

where the first inequality follows from the optimality of  $\bar{X}^{t-1}$  for the function  $\mathcal{L}(X, Y^{t-1})$  defined by  $Y^{t-1}$ , and the last equality follows from the dual update in GDMM (14).  $\square$

On the other hand, the following lemma gives an expression on the primal progress that is independent of the algorithm used for minimizing Augmented Lagrangian

**Lemma 2** (Primal Progress). *Each iteration of GDMM (Algorithm 1) has*

$$\begin{aligned} \Delta_p^t - \Delta_p^{t-1} &\leq \mathcal{L}(X^{t+1}, Y^t) - \mathcal{L}(X^t, Y^t) \\ &\quad + \eta \|\mathbf{A}X^t - \mathbf{A}\bar{X}^t\|^2 - \eta \langle \mathbf{A}X^t, \mathbf{A}\bar{X}^t \rangle \end{aligned}$$

*Proof.*

$$\begin{aligned} &\Delta_p^t - \Delta_p^{t-1} \\ &= \mathcal{L}(X^{t+1}, Y^t) - \mathcal{L}(X^t, Y^{t-1}) - (d(Y^t) - d(Y^{t-1})) \\ &= \mathcal{L}(X^{t+1}, Y^t) - \mathcal{L}(X^t, Y^t) + \mathcal{L}(X^t, Y^t) - \mathcal{L}(X^t, Y^{t-1}) \\ &\quad + (d(Y^{t-1}) - d(Y^t)) \\ &\leq \mathcal{L}(X^{t+1}, Y^t) - \mathcal{L}(X^t, Y^t) + \eta \|\mathbf{A}X^t\|^2 - \eta \langle \mathbf{A}X^t, \mathbf{A}\bar{X}^t \rangle \end{aligned}$$

where the last inequality uses Lemma 1 on  $d(Y^{t-1}) - d(Y^t) = \Delta_d^t - \Delta_d^{t-1}$ .  $\square$

By combining results of Lemma 1 and 2, we can obtain a joint progress of the form

$$\begin{aligned} &\Delta_d^t - \Delta_d^{t-1} + \Delta_p^t - \Delta_p^{t-1} \\ &\leq \mathcal{L}(X^{t+1}, Y^t) - \mathcal{L}(X^t, Y^t) + \eta \|\mathbf{A}X^t - \mathbf{A}\bar{X}^t\|^2 \\ &\quad - \eta \|\mathbf{A}\bar{X}^t\|^2 \end{aligned} \quad (27)$$

Note the only term that can be positive in (27) is the second. To guarantee descent of the joint progress, we bound the second term with the primal gap  $\mathcal{L}(X^t, Y^t) - d(Y^t)$  given by the following lemma

**Lemma 3.**

$$\|\mathbf{A}X^t - \mathbf{A}\bar{X}^t\|^2 \leq \frac{2}{\rho} (\mathcal{L}(X^t, Y^t) - \mathcal{L}(\bar{X}^t, Y^t)) \quad (28)$$

*Proof.* Let

$$\tilde{\mathcal{L}}(X, Y) = h(X) + g(\mathbf{A}X),$$

where

$$g(\mathbf{A}X) = \frac{\rho}{2} \|\mathbf{A}X\|^2$$

and

$$h(X) = \langle C, X \rangle + \langle Y, \mathbf{A}X \rangle + \mathbf{I}_{X \in \mathcal{C}}$$

, where  $\mathbf{I}_{X \in \mathcal{C}} = 0$  if  $X \in \mathcal{C}$  and  $\mathbf{I}_{X \in \mathcal{C}} = \infty$  otherwise, and

$$\mathcal{C} = \{(W_1, W_2) \mid W_1 \in \text{Conv}(\mathcal{A}), W_2 \in \text{Conv}(\mathcal{G})\}. \quad (29)$$

Note we have  $\tilde{\mathcal{L}}(\bar{X}^t, Y^t) = \mathcal{L}(\bar{X}^t, Y^t)$ ,  $\tilde{\mathcal{L}}(X^t, Y^t) = \mathcal{L}(X^t, Y^t)$  due to feasible iterates. According to the definition of  $d(Y)$ , we know that

$$0 \in \partial_X \tilde{\mathcal{L}}(\bar{X}^t, Y) = \partial h(\bar{X}^t) + \mathbf{A}^T \nabla g(\mathbf{A}(\bar{X}^t))$$

And by the convexity of  $h(\cdot)$  and the strong convexity of  $g(\cdot)$ , we have

$$h(X^t) - h(\bar{X}^t) \geq \langle \partial h(\bar{X}^t), X^t - \bar{X}^t \rangle$$

and

$$\begin{aligned} & g(\mathbf{A}(X^t)) - g(\mathbf{A}(\bar{X}^t)) \\ & \geq \langle \mathbf{A}^T (\nabla g(\mathbf{A}(\bar{X}^t))), X^t - \bar{X}^t \rangle + \frac{\rho}{2} \|\mathbf{A}(X^t) - \mathbf{A}(\bar{X}^t)\|^2 \end{aligned}$$

The the above two together implies

$$\mathcal{L}(X^t, Y^t) - \mathcal{L}(\bar{X}^t, Y^t) \geq \frac{\rho}{2} \|\mathbf{A}(X^t) - \mathbf{A}(\bar{X}^t)\|^2$$

which leads to our conclusion.  $\square$

Then to guarantee significant descent of (27) relative to the current sub-optimality, we need to lower bound the magnitude of first term  $\mathcal{L}(X^{t+1}, Y^t) - \mathcal{L}(X^t, Y^t)$  and last term  $-\eta \|\mathbf{A}\bar{X}^t\|^2$ . Note by Danskins theorem, we have

$$\nabla d(Y^t) = \mathbf{A}\bar{X}^t$$

and we have the following lower bound on  $\|\mathbf{A}\bar{X}^t\|$  by the concavity of  $d(Y)$

$$\begin{aligned} d^* - d(Y^t) & \leq \langle \mathbf{A}\bar{X}^t, Y^{t*} - Y^t \rangle \\ & \leq \|\mathbf{A}\bar{X}^t\| \|Y^{t*} - Y^t\| \\ & \leq \|\mathbf{A}\bar{X}^t\| R_Y \end{aligned}$$

where  $Y^{t*}$  is the maximizer of  $d(Y)$  that is closest to  $Y^t$  and  $R_Y$  is an upper bound on the distance (in  $\ell_2$  norm) of dual iterates  $\{Y^t\}_{t=0}^T$  to its projection to the set of maximizer of  $d(Y)$ . Therefore, the progress (27) can be lower bounded as

$$\begin{aligned} & \Delta_d^t - \Delta_d^{t-1} + \Delta_p^t - \Delta_p^{t-1} \\ & \leq \mathcal{L}(X^{t+1}, Y^t) - \mathcal{L}(X^t, Y^t) \\ & \quad + \frac{2\eta}{\rho} (\mathcal{L}(X^t, Y^t) - \mathcal{L}(\bar{X}^t, Y^t)) - \frac{\eta}{R_Y^2} \Delta_d^{t2} \end{aligned} \quad (30)$$

The remaining thing to do is show that one good step of Away-Step Frank-Wolfe iterate suffices to give descent amount  $\mathcal{L}(X^{t+1}, Y^t) - \mathcal{L}(X^t, Y^t)$  lower bounded by some

constant multiple of the primal sub-optimality  $\mathcal{L}(X^t, Y^t) - \mathcal{L}(\bar{X}^t, Y^t)$ . Then by selecting GDMM step size  $\eta$  small enough, the RHS of (30) leads to a positive descent amount. Note this can be achieved by leveraging recent result from (Lacoste-Julien & Jaggi, 2015), who shows a linear-type convergence of AFW, even for non-strongly convex function of form (25). We thus provide the following lemma.

**Lemma 4.** *The AFW (Algorithm 2) performed on  $X = (W_1, W_2)$  gives descent amount*

$$\begin{aligned} & \mathcal{L}(X^{t+1}, Y^t) - \mathcal{L}(X^t, Y^t) \\ & \leq -\frac{\kappa}{1 + \kappa} (\mathcal{L}(X^t, Y^t) - \mathcal{L}(\bar{X}^t, Y^t)) \end{aligned} \quad (31)$$

where  $\kappa := \mu_f / (8C_f^A)$ ,  $\mu_f$  is the generalized geometric strong convexity constant for function  $\mathcal{L}(\cdot)$  in domain  $\mathcal{C}$ , and  $C_f^A$  is the corresponding smoothness constant.

*Proof.* Note the AL (25) is of the form

$$F(X) = \mathcal{L}(X, Y) = \langle C, X \rangle + f(\mathbf{A}X) \quad (32)$$

where  $f(\mathbf{A}X) = \frac{\rho}{2} \|\mathbf{A}X + Y/\rho\|^2 + \text{const.}$  is a  $\rho$ -strongly convex function w.r.t. to  $\mathbf{A}X$ , and we are minimizing the function subject to a polyhedral domain  $\mathcal{C}$  (defined at (29)). Therefore, by Theorem 10 of (Lacoste-Julien & Jaggi, 2015), we have the generalized geometrical strong convexity constant  $\mu_f$  for function  $\mathcal{L}(\cdot)$  in domain  $\mathcal{C}$  that has

$$\mu_f \geq \mu(\text{PWidth}(\mathcal{C})) \quad (33)$$

where  $\text{PWidth}(\mathcal{C}) > 0$  is the pyramidal width of polyhedron  $\mathcal{C}$  and  $\mu$  is the generalized strong convexity constant of function (32) defined in Lemma 9 of (Lacoste-Julien & Jaggi, 2015). By definition of the geometric strong convexity constant, we have

$$F(X) - F^* \leq \frac{g_X^2}{2\mu_f} \quad (34)$$

from (28) in (Lacoste-Julien & Jaggi, 2015), where  $g_X = \langle \nabla F(X), \mathbf{v}_{FW}(X) - \mathbf{v}_A(X) \rangle$  for any FW atom  $\mathbf{v}_{FW}(X)$  and away atom  $\mathbf{v}_A(X)$  at point  $X$ . Note, since the convex polyhedron  $\mathcal{C}$  is separable w.r.t.  $W_1, W_2$ , we have

$$\mathbf{v}_{FW}(X) = \begin{bmatrix} \mathbf{v}_{FW}^{(1)} \\ \mathbf{v}_{FW}^{(2)} \end{bmatrix} \quad (35)$$

and

$$\mathbf{v}_A(X) = \begin{bmatrix} \mathbf{v}_A^{(1)} \\ \mathbf{v}_A^{(2)} \end{bmatrix} \quad (36)$$

Then consider the progress given by a non-drop ("good")

step at iterate  $s$  of the AFW. We have

$$\begin{aligned} F(X^{s+1}) - F(X^s) &\leq -\frac{\gamma}{2}g_s + \frac{C_f^A}{2}\gamma^2 \\ &\leq -\frac{g_s^2}{16C_f^A} \\ &\leq -\frac{\mu_f(F(X^s) - F^*)}{8C_f^A} \end{aligned} \quad (37)$$

assuming  $\gamma^* = g_s/(2C) < 1$ , where  $g_s = \langle -\nabla F, \mathbf{v}_{FW}(X^s) - \mathbf{v}_A(X^s) \rangle$ ,  $C_f^A$  is the curvature constant of  $F(X)$  on domain  $\mathcal{C}$  (eq. (26) in (Lacoste-Julien & Jaggi, 2015)). The first inequality follows from the fact that AFW chooses the smaller one between  $\langle \nabla F, \mathbf{d}_{FW} \rangle$  and  $\langle \nabla F, \mathbf{d}_A \rangle$  as the descent direction. The second inequality is given by minimizing RHS w.r.t.  $\gamma \in [0, 1]$ . And the third inequality is from (34). In case  $\gamma^* = g_s/(2C) > 1$ , we have  $\gamma = 1$  and

$$\begin{aligned} F(X^{s+1}) - F(X^s) &\leq -\frac{\gamma}{2}g_s + \frac{C_f^A}{2}\gamma^2 \\ &\leq -g_s/4 \leq -(F(X^s) - F^*)/4 \\ &\leq -\frac{\mu_f(F(X^s) - F^*)}{8C_f^A} \end{aligned} \quad (38)$$

which leads to the same result.

Then let  $\kappa = \mu_f/(8C_f^A)$ . We have

$$\begin{aligned} F(X^{t+1}) - F(X^t) &\leq F(X^{s+1}) - F(X^s) \\ &\leq -\kappa(F(X^s) - F^*) \\ &\leq -\kappa(F(X^{t+1}) - F^*) \end{aligned}$$

where the first inequality is due to  $F(X^t) \geq F(X^s)$  (since AFW is an descent algorithm). Through rearrangement we have

$$F(X^{t+1}) - F^* \leq \frac{1}{1+\kappa}(F(X^t) - F^*)$$

which then leads to the conclusion.  $\square$

Now we provide proof of the main theorem 2 as follows.

*Proof.* By lemma 4 and (30), we have

$$\begin{aligned} &\Delta_d^t - \Delta_d^{t-1} + \Delta_p^t - \Delta_p^{t-1} \\ &\leq \frac{-\kappa}{1+\kappa} (\mathcal{L}(X^t, Y^t) - \mathcal{L}(\bar{X}^t, Y^t)) \\ &\quad + \frac{2\eta}{\rho} (\mathcal{L}(X^t, Y^t) - \mathcal{L}(\bar{X}^t, Y^t)) - \frac{\eta}{R_Y^2} \Delta_d^t. \end{aligned} \quad (39)$$

Then by choosing  $\eta < \frac{\kappa\rho}{2(1+\kappa)}$ , we have guaranteed descent on  $\Delta_p + \Delta_d$  for each GDMM iteration. By choosing  $\eta \leq$

$\frac{\kappa\rho}{4(1+\kappa)}$ , we have

$$\begin{aligned} &(\Delta_d^t + \Delta_p^t) - (\Delta_d^{t-1} + \Delta_p^{t-1}) \\ &\leq \frac{-\kappa}{2(1+\kappa)} (\mathcal{L}(X^t, Y^t) - \mathcal{L}(\bar{X}^t, Y^t)) - \frac{\eta}{R_Y^2} \Delta_d^{t2} \\ &\leq \frac{-\kappa}{2(1+\kappa)} \Delta_p^t - \frac{\kappa\rho}{4(1+\kappa)R_Y^2} \Delta_d^{t2} \\ &\leq \frac{-\kappa}{2(1+\kappa)(\Delta_p^0 + \Delta_d^0)} \Delta_p^{t2} - \frac{\kappa\rho}{4(1+\kappa)R_Y^2} \Delta_d^{t2} \\ &\leq -\left( \frac{\kappa}{4(1+\kappa)} \min\left(\frac{1}{\Delta_p^0 + \Delta_d^0}, \frac{\rho}{2R_Y^2}\right) \right) (\Delta_p^t + \Delta_d^t)^2 \end{aligned}$$

where the third inequality is by non-increasing of  $\{\Delta_p^t + \Delta_d^t\}_{t=1}^\infty$ . Then recursion of the form  $\Delta^t - \Delta^{t-1} \leq c\Delta^{t2}$  leads to the conclusion.  $\square$
